# Supplementary material for: Digitale Gesundheitskompetenz von Personen mit und ohne Migrationserfahrung – Ein Vergleich von zwei Querschnittbefragungen
Source: Springer Nature journal article supplement (doi:10.1007/s11553-024-01112-4), 2024-04-16
Supplement: MOESM1 [file 26985080]

## Online Anhang

Tab. 1: Nutzungshäufigkeiten digitaler gesundheitsbezogener Informationsangebote und DGK-Mittelwerte (Standardfehler) nach Migrationserfahrung

|                                         | Keine Migrationserfahrung |             |             | Eigene Migrationserfahrung |             |             | Elterliche Migrationserfahrung |             |             |             |
|-----------------------------------------|---------------------------|-------------|-------------|----------------------------|-------------|-------------|--------------------------------|-------------|-------------|-------------|
|                                         | Anzahl                    | Anteil in % | DGK         | Anzahl                     | Anteil in % | DGK         | Anzahl                         | Anteil in % | DGK         |             |
| Internetseiten: häufig                  | 78                        | 18,3        | 63,0 (3,20) | 197                        | 26,5        | 59,3 (2,07) | 72                             | 29,1        | 67,0 (3,07) |             |
|                                         | selten                    | 223         | 52,3        | 49,7 (1,94)                | 358         | 48,2        | 52,6 (1,57)                    | 123         | 49,8        | 63,6 (2,43) |
|                                         | nie                       | 125         | 29,3        | 24,9 (2,85)                | 188         | 25,3        | 25,5 (2,27)                    | 52          | 21,1        | 50,9 (4,06) |
| Soziale Medien: häufig                  | 32                        | 7,5         | 65,6 (4,35) | 117                        | 15,7        | 59,7 (2,81) | 47                             | 18,8        | 64,6 (3,71) |             |
|                                         | selten                    | 152         | 35,7        | 55,8 (2,39)                | 243         | 32,5        | 52,0 (1,85)                    | 78          | 31,2        | 64,9 (2,95) |
|                                         | nie                       | 242         | 56,8        | 35,5 (2,09)                | 387         | 51,8        | 40,9 (1,72)                    | 125         | 50,0        | 59,0 (2,64) |
| Digitale Geräte: häufig                 | 114                       | 26,4        | 56,3 (2,86) | 241                        | 32,1        | 57,9 (1,80) | 101                            | 40,2        | 65,9 (2,37) |             |
|                                         | selten                    | 37          | 8,6         | 50,7 (4,94)                | 79          | 10,5        | 52,5 (3,16)                    | 36          | 14,3        | 62,5 (4,78) |
|                                         | nie                       | 281         | 65,0        | 39,9 (1,95)                | 431         | 57,4        | 40,7 (1,64)                    | 114         | 45,4        | 58,5 (2,84) |
| Gesundheits-Apps: häufig                | 73                        | 16,9        | 56,0 (3,33) | 165                        | 22,1        | 58,0 (2,09) | 90                             | 35,4        | 65,4 (2,69) |             |
|                                         | selten                    | 28          | 6,5         | 51,3 (5,97)                | 76          | 10,2        | 62,5 (3,29)                    | 40          | 15,7        | 59,1 (4,22) |
|                                         | Nichtnutzung              | 330         | 76,6        | 41,9 (1,82)                | 507         | 67,8        | 41,7 (1,48)                    | 124         | 48,8        | 60,7 (2,64) |
| Digitaler Austausch: häufig oder selten | 99                        | 23,2        | 61,2 (3,03) | 159                        | 21,5        | 59,1 (2,24) | 74                             | 29,5        | 65,7 (2,82) |             |
|                                         | nie                       | 327         | 76,8        | 39,8 (1,77)                | 580         | 78,5        | 44,0 (1,37)                    | 177         | 70,5        | 60,5 (2,19) |

DGK: Digitale Gesundheitskompetenz (Skala 0–100)

Tab. 2: Regressionsergebnisse für digitale Gesundheitskompetenz (0–100) für jeweilige Nutzung digitaler gesundheitsbezogener Informationsangebote nach Migrationserfahrung (ME)

|                                   | Ohne ME       |        | Eigene ME     |        | Elterliche ME |       |
|-----------------------------------|---------------|--------|---------------|--------|---------------|-------|
|                                   | B             | p      | B             | p      | B             | p     |
| Internetseiten: häufig (Referenz) |               |        |               |        |               |       |
| selten                            | <b>-10,36</b> | 0,006  | <b>-6,03</b>  | 0,027  | -1,05         | 0,815 |
| nie                               | <b>-26,38</b> | <0,001 | <b>-24,91</b> | <0,001 | <b>-14,55</b> | 0,008 |

|                                                                                                                                                                      |               |        |               |        |        |       |
|----------------------------------------------------------------------------------------------------------------------------------------------------------------------|---------------|--------|---------------|--------|--------|-------|
| Soziale Medien: häufig (Referenz)                                                                                                                                    |               |        |               |        |        |       |
| selten                                                                                                                                                               | -8,99         | 0,110  | <b>-8,81</b>  | 0,013  | -0,893 | 0,872 |
| nie                                                                                                                                                                  | <b>-21,02</b> | <0,001 | <b>-12,11</b> | <0,001 | -6,53  | 0,202 |
| Digitale Geräte: häufig (Referenz)                                                                                                                                   |               |        |               |        |        |       |
| selten                                                                                                                                                               | -7,72         | 0,172  | -4,81         | 0,245  | -5,58  | 0,344 |
| nie                                                                                                                                                                  | <b>-7,81</b>  | 0,021  | <b>-10,36</b> | <0,001 | -6,60  | 0,107 |
| Apps: häufig (Referenz)                                                                                                                                              |               |        |               |        |        |       |
| selten                                                                                                                                                               | -3,77         | 0,560  | 6,95          | 0,110  | -2,84  | 0,624 |
| nie                                                                                                                                                                  | -3,97         | 0,312  | <b>-6,94</b>  | 0,018  | -3,14  | 0,461 |
| Digitaler Austausch: häufig/selten (Referenz)                                                                                                                        |               |        |               |        |        |       |
| nie                                                                                                                                                                  | <b>-11,84</b> | <0,001 | <b>-7,49</b>  | 0,012  | -2,44  | 0,554 |
| Adjustiert für Geschlecht, Altersgruppe, Bildungsniveau, Sozialstatus, finanzielle Deprivation<br>B: unstandardisierter Regressionskoeffizient; p: Signifikanzniveau |               |        |               |        |        |       |

Tab. 3: Regressionsergebnisse für digitale Gesundheitskompetenz (0–100) nach Migrationserfahrung (ME) und Nutzung digitaler gesundheitsbezogener Informationsangebote

|                                                                                                                                                                      | Internetseiten |        | Soziale Medien |        | Digitale Geräte |        | Apps         |       | Digitaler Austausch |        |
|----------------------------------------------------------------------------------------------------------------------------------------------------------------------|----------------|--------|----------------|--------|-----------------|--------|--------------|-------|---------------------|--------|
|                                                                                                                                                                      | B              | p      | B              | p      | B               | p      | B            | p     | B                   | p      |
| Ohne ME (Referenz)                                                                                                                                                   |                |        |                |        |                 |        |              |       |                     |        |
| Eigene ME                                                                                                                                                            | 1,67           | 0,381  | 1,79           | 0,361  | 1,61            | 0,409  | 1,80         | 0,357 | 2,82                | 0,152  |
| Elterliche ME                                                                                                                                                        | <b>6,31</b>    | 0,015  | <b>6,31</b>    | 0,018  | <b>5,82</b>     | 0,028  | <b>5,82</b>  | 0,029 | <b>7,05</b>         | 0,008  |
| Nutzung: häufig (Referenz)                                                                                                                                           |                |        |                |        |                 |        |              |       |                     |        |
| selten                                                                                                                                                               | <b>-7,01</b>   | <0,001 | <b>-6,77</b>   | 0,010  | -5,13           | 0,077  | 2,57         | 0,404 |                     |        |
| nie                                                                                                                                                                  | <b>-23,18</b>  | <0,001 | <b>-13,22</b>  | <0,001 | <b>-8,94</b>    | <0,001 | <b>-5,48</b> | 0,008 | <b>-8,33</b>        | <0,001 |
| Adjustiert für Geschlecht, Altersgruppe, Bildungsniveau, Sozialstatus, finanzielle Deprivation<br>B: unstandardisierter Regressionskoeffizient; p: Signifikanzniveau |                |        |                |        |                 |        |              |       |                     |        |
